# Supplementary material
Source: Springer Nature journal article supplement (https://www.springermedizin.de/resource/supplementary/13054_2012_1701_MOESM3_ESM.pdf/9711260)

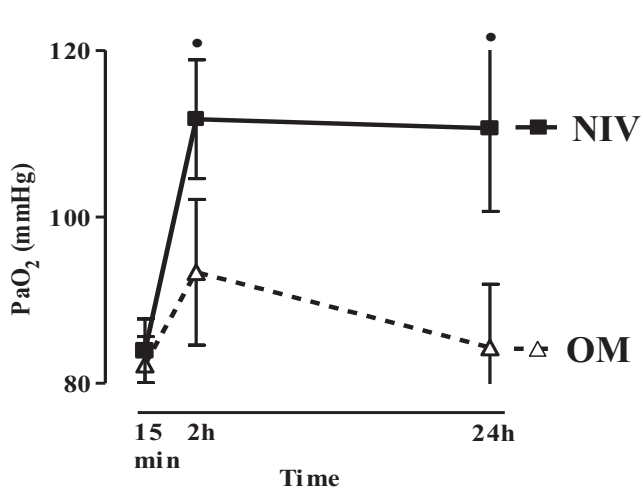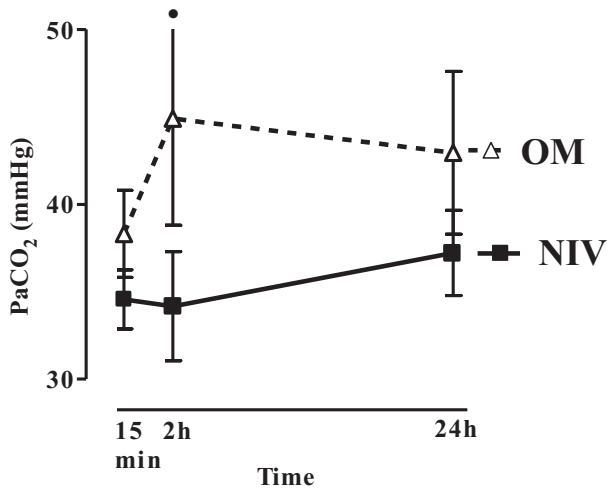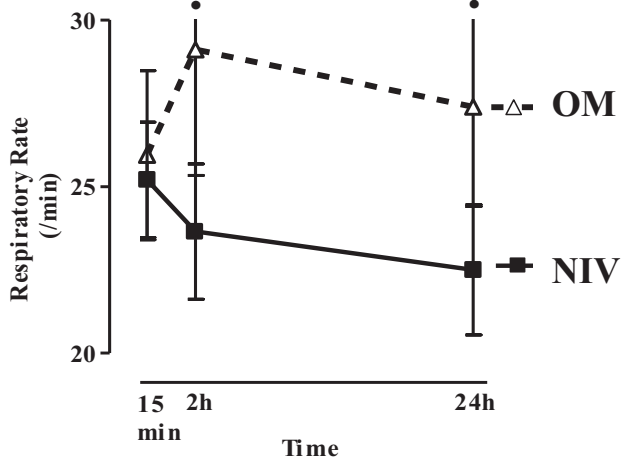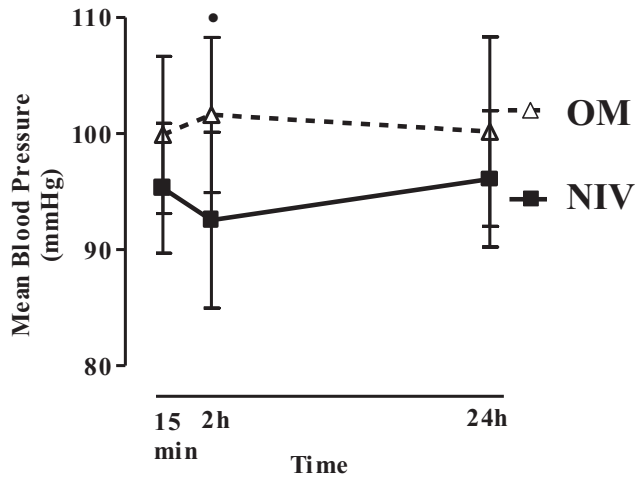

\*p<0.05

Supplement: MOESM3 [file 9711260]
